# Supplementary material for: Global trends in the research on Legg–Calve–Perthes disease in Web of Science
Source: Front Pediatr. 2024 Mar 7;12:1335118. doi: 10.3389/fped.2024.1335118 (PMC10954890; doi:10.3389/fped.2024.1335118)
Supplement: Supplementary Table 3 — All authors’ distribution. [file Table3.xlsx]

## Sheet: Supplementary Table 3
Authors	Records
Kim HKW	57
Tannast M	14
Joseph B	13
Siebenrock KA	13
Steppacher SD	13
Herring JA	12
Sankar WN	12
Hailer YD	11
Krauspe R	11
Rowe SM	10
Shah H	10
Aksoy MC	9
Aruwajoye O	9
Jung ST	9
Laine JC	9
Schoenecker PL	9
Domb BG	8
Kitoh H	8
Moon ES	8
Song HR	8
Bilgili F	7
Clohisy JC	7
Guarniero R	7
Perry DC	7
Westhoff B	7
Yamaguchi R	7
Yoo WJ	7
Cho TJ	6
Choi IH	6
Dempsey M	6
Grzegorzewski A	6
Kamiya N	6
Kim HT	6
Kim YJ	6
Memis A	6
Novais EN	6
Wenger DR	6
Carlson CS	5
Chung CY	5
Doria AS	5
Eijer H	5
Fabry G	5
Ganz R	5
Gilbert SR	5
Hosalkar HS	5
Jo CH	5
Johnson CP	5
Larson AN	5
Matsushita M	5
Millis MB	5
Mishima K	5
Moens P	5
Mulpuri K	5
Park MS	5
Schrader T	5
Slongo T	5
Toth F	5
Varli S	5
Yazici M	5
Yoon TR	5
Accadbled F	4
Adapala NS	4
Alpaslan AM	4
Aruwajoye OO	4
Bian H	4
Bittersohl B	4
Browne R	4
Bruce CE	4
Castaneda P	4
Chen E	4
Chung JY	4
Cunha FG	4
De Gauzy JS	4
Du J	4
Ellermann JM	4
Erkus S	4
Garces A	4
Ishiguro N	4
Jo C	4
Kalenderer O	4
Kamegaya M	4
Kelly DM	4
Kim WC	4
Little DG	4
Mcguire MF	4
Mehlman CT	4
Modena M	4
Molnar LJ	4
Morris WZ	4
Novotny SA	4
Park KW	4
Price CT	4
Ren YS	4
Roy DR	4
Saisu T	4
Shore BJ	4
Siddesh ND	4
Singh KA	4
Song EK	4
Takamura K	4
Turgut A	4
Vukasinovic Z	4
Zaltz I	4
Ziebarth K	4
Zilkens C	4
Abril JC	3
Agar G	3
Aksoy DY	3
Albers CE	3
Anwander H	3
Armstrong AR	3
Aya-ay J	3
Bahmanyar S	3
Beer Y	3
Beil FT	3
Boss JH	3
Bowen JR	3
Briggs KK	3
Burgess J	3
Canavese F	3
Cerri GG	3
Crawford AH	3
Dangerfield P	3
De Godoy RM	3
Deng Z	3
Dillman JR	3
Ding XF	3
Dobson CA	3
Egea-gamez RM	3
Ekbom A	3
Elstein D	3
Fagan MJ	3
Farnsworth CL	3
Fuchs K	3
Gahleitner M	3
Glueck CJ	3
Gotterbarm T	3
Grangeiro PM	3
Gresky J	3
Grossbotzl G	3
Haamberg T	3
Haas C	3
Hall AJ	3
Hayek S	3
Hernandez-zamora E	3
Hosalkar H	3
Hosokawa M	3
Ihme N	3
Imagama S	3
Jackson TJ	3
Jager M	3
Kamiya Y	3
Kim H	3
Kim S	3
Kim SS	3
Kitakoji T	3
Kubo T	3
Kuroyanagi G	3
Kusakabe T	3
Lall AC	3
Lee JJ	3
Lee KB	3
Liao SJ	3
Lindner D	3
Lodhia P	3
Lu RB	3
Luring C	3
Luzo C	3
Maldonado DR	3
Martiny F	3
Matsumoto H	3
Miese F	3
Misselevich I	3
Mont MA	3
Nakamura J	3
Nakamura T	3
Nilsson O	3
Oh HS	3
Perry D	3
Peters CL	3
Philippon MJ	3
Pisecky L	3
Platt MJ	3
Polizzi A	3
Pope D	3
Ramachandran M	3
Reyes-maldonado E	3
Rodriguez-olivas AO	3
Ruggieri M	3
Salpietro V	3
Sayinalp N	3
Smorgick Y	3
Spasovski D	3
Stake CE	3
Stevoska S	3
Synder M	3
Tercier S	3
Tis JE	3
Volpon JB	3
Wada A	3
Wang P	3
Yamaguchi T	3
Yanagida H	3
Zahedi AR	3
Zimran A	3
Zivkovic Z	3
Achan P	2
Adulkasem N	2
Alpaslan M	2
Antoch G	2
Atabiev BC	2
Bacaksiz T	2
Balasa VV	2
Bauer T	2
Baunin C	2
Bauss F	2
Beaule PE	2
Bowen RJ	2
Brabham C	2
Brand RA	2
Bursali A	2
Caglar O	2
Chan EF	2
Chandrasekaran S	2
Chang EY	2
Chang K	2
Chen XX	2
Cheon JE	2
Cho SB	2
Christensen F	2
Citlak A	2
Clarke NM	2
Clarke NMP	2
Claude I	2
Comfort SM	2
Copeliovitch L	2
Curcio C	2
De Angeli LRA	2
De Rosa V	2
De Sanctis N	2
Dimeglio A	2
Dwek JR	2
Ecker TM	2
Erkula G	2
Ezra E	2
Fehr M	2
Froberg L	2
Galan-olleros M	2
Glutting J	2
Gokani V	2
Goldstein RY	2
Gruppo RA	2
Gudmundsson P	2
Guille JT	2
Gupta VK	2
Hailer NP	2
Hanke MS	2
Hanna SA	2
Hauschild G	2
Haverkamp D	2
Haznedaroglu IC	2
He W	2
Hernandez RJ	2
Holstein A	2
Hong P	2
Huang DS	2
Huang Q	2
Hwang DS	2
Hyman JE	2
Ishida A	2
Jandl NM	2
Jozwiak M	2
Kakizaki J	2
Kaneko H	2
Katoh M	2
Kenet G	2
Kim HK	2
Kim HW	2
Kim JR	2
Kim MS	2
Kim SJ	2
Kim TW	2
Kirazli S	2
Klotz MCM	2
Kocjancic B	2
Koob TJ	2
Kozlowski P	2
Kralj-iglic V	2
Kuo KN	2
Kutschke M	2
Kuwajima SS	2
Kwon KS	2
Kyin C	2
Lan X	2
Lauen J	2
Laville JM	2
Lee JH	2
Lee JS	2
Lee KS	2
Lee SH	2
Lee WY	2
Leibold CS	2
Leunig M	2
Levin D	2
Li BX	2
Li J	2
Liao W	2
Lin CS	2
Liu RW	2
Liu Y	2
Liu YH	2
Lu A	2
Lubetsky A	2
Ma C	2
Mahnken AH	2
Mamisch TC	2
Manig M	2
Maranho DA	2
Marti RK	2
Martin BD	2
Mazda K	2
Mccormack D	2
Mclaughlin RM	2
Meurer A	2
Mikami Y	2
Milani C	2
Miller L	2
Miller PE	2
Milone P	2
Mirovsky Y	2
Molicnik A	2
Montenegro NB	2
Montero M	2
Montgomery SM	2
Moon HJ	2
Mor M	2
Morelli V	2
Morgan-bagley S	2
Murphy SB	2
Nakashima Y	2
Napiontek M	2
Neal DC	2
Nellesen J	2
Nepple JJ	2
Nishimura G	2
Overgaard S	2
Pai H	2
Pailhe R	2
Palazon-quevedo A	2
Pashos G	2
Pavone P	2
Pavone V	2
Pedersen NW	2
Peskin B	2
Pinheiro M	2
Podeszwa DA	2
Pringle D	2
Puls M	2
Qi XY	2
Reis DN	2
Rejuso CA	2
Rohn K	2
Rondinella F	2
Rosenberg N	2
Rosenfeld SB	2
Rosinsky PJ	2
Ruzbarsky JJ	2
Sah RL	2
Sahin V	2
Savasta S	2
Savelyev R	2
Scherzer C	2
Schmaranzer F	2
Schmitz MR	2
Schneider R	2
Schwab JM	2
Sebag G	2
Segev E	2
Shapira J	2
Sheehan E	2
Shitrit R	2
Shohat N	2
Sibinski M	2
Sierra RJ	2
Staatz G	2
Stadler C	2
Stans AA	2
Stief F	2
Strouse PJ	2
Stuecker MHF	2
Stuecker R	2
Su EP	2
Su PQ	2
Suarez-ahedo C	2
Sucato DJ	2
Suh SW	2
Sun XS	2
Szymczak W	2
Takahashi K	2
Talwalkar V	2
Tang ZW	2
Thorey F	2
Thoveson A	2
Tsuchida Y	2
Upasani VV	2
Vail TP	2
Van Campenhout A	2
Vial J	2
Wainwright AM	2
Wall EJ	2
Wang TT	2
Weiner DS	2
Wen J	2
Werlen S	2
Whitlock P	2
Wientroub S	2
Willers R	2
Windhagen H	2
Winzenrieth R	2
Witte F	2
Xiao S	2
Xu HW	2
Xu JY	2
Xu RJ	2
Yamada N	2
Yamamoto T	2
Yen YM	2
Yu RH	2
Yu S	2
Yuksel K	2
Zhang C	2
Zhang JF	2
Zhang TJ	2
Zhang YX	2
Zhu H	2
Zinman C	2
Zurmuhle CA	2
Aarvold A	1
Abd El-ghaffar TM	1
Abd Elkader MS	1
Abdelfattah M	1
Abdelghafar K	1
Abitan A	1
Abu Amara S	1
Abu-amer Y	1
Abulsoud MI	1
Achar S	1
Ackermann J	1
Adamec O	1
Adkins SB	1
Adolf S	1
Adolfsen SE	1
Aftimos S	1
Agossou-voyeme AK	1
Aguiar F	1
Ahn BW	1
Ahn NU	1
Aicua EA	1
Ailabouni R	1
Ajdinovic B	1
Akahane T	1
Akbarian-bafghi MJ	1
Akgun R	1
Akgun RC	1
Akhtyamov I	1
Akiyama M	1
Aksoy N	1
Al Karmi F	1
Al Omari L	1
Al-khateeb H	1
Al-omran AK	1
Alanay A	1
Albayrak S	1
Alboraie M	1
Alemdar C	1
Alexander P	1
Alford TH	1
Alhassan E	1
Ali S	1
Alling KM	1
Altay MA	1
Alvandi BA	1
Amer ARAL	1
Amer M	1
Amigo MT	1
Aminian A	1
Amling M	1
Amstutz HC	1
Andereya S	1
Anderson L	1
Anderson LA	1
Angsanuntsukh C	1
Anooshiravani M	1
Anthony CA	1
Antolic V	1
Antoniou D	1
Antunes H	1
Appel M	1
Aran A	1
Arbona C	1
Ardern CL	1
Ariyawatkul T	1
Arnold E	1
Arthur DT	1
Arthurs G	1
Asirvatham R	1
Aswath PB	1
Atanda A	1
Ataoglu MB	1
Athavale S	1
Atherton WG	1
Attia J	1
Atzmon R	1
Aubert D	1
Austin CC	1
Ayanoglu T	1
Aydin AS	1
Aydin BK	1
Aydin H	1
Aydingoz U	1
Ayeni OR	1
Azboy I	1
Azorin-cuadrillero D	1
Bache CE	1
Bacher J	1
Bacheville E	1
Back SJ	1
Backstein DB	1
Bae SH	1
Baghdadi YMK	1
Baghdady S	1
Bai CY	1
Baird GO	1
Bajuifer S	1
Bajwa N	1
Baker JF	1
Baki C	1
Baldawi H	1
Baldwin K	1
Baldwin KD	1
Bale P	1
Ballatore T	1
Ballesteros MA	1
Baraka MM	1
Barnewolt CE	1
Baroni E	1
Barrack RL	1
Barras PW	1
Barsi J	1
Barvencik F	1
Bascarevic Z	1
Basile G	1
Bastrom TP	1
Bauerochse A	1
Bearcroft P	1
Bechler U	1
Beck JJ	1
Bedir A	1
Beighton P	1
Belfiore G	1
Bellova P	1
Bellyei A	1
Beluffi G	1
Belzile EL	1
Bencardino JT	1
Bennett JT	1
Benson MK	1
Benson MKD	1
Berard J	1
Berend K	1
Berend KR	1
Berenstein-weyel T	1
Berg RP	1
Berg S	1
Berger E	1
Berger-groch J	1
Berman J	1
Berrios R	1
Berthaume MA	1
Bhave S	1
Bhethanabotla V	1
Bhethanabotla VR	1
Bhuyan BK	1
Bian Z	1
Biedermann R	1
Bielski RJ	1
Bilasy SE	1
Bilge A	1
Binkley HM	1
Biyi A	1
Blackwell A	1
Bloch J	1
Blondin D	1
Bloomberg E	1
Blum S	1
Blumberg TJ	1
Bobbey AJ	1
Boechat MI	1
Bohm H	1
Boiocchi S	1
Bollini G	1
Bomar JD	1
Bomer J	1
Bonin N	1
Bormanis J	1
Bosakhar B	1
Botros D	1
Botser IB	1
Boyd HS	1
Boyer C	1
Brackmann HH	1
Braga MB	1
Braito M	1
Bram JT	1
Breur GJ	1
Breyer S	1
Brice AK	1
Briggs K	1
Brillet PY	1
Briody J	1
Briot J	1
Brisby H	1
Brito I	1
Brkic M	1
Brown G	1
Brown S	1
Bruce C	1
Bryant M	1
Buchler L	1
Buchpiguel C	1
Buendia-pazaran JG	1
Buko EO	1
Bulut M	1
Burger S	1
Bursali AE	1
Burton N	1
Busconi BD	1
Busetto R	1
Buthmann J	1
Butscheidt S	1
Buyuk AF	1
Buyukdogan K	1
Byrd JWT	1
Cahuzac JP	1
Cai GQ	1
Caldaci A	1
Callejo FP	1
Caltabiano R	1
Caltoum CB	1
Camurcu IY	1
Canete-gibas C	1
Cankus MC	1
Cannamela PC	1
Cannegieter SC	1
Cantrill LC	1
Cao S	1
Cao X	1
Cardoso I	1
Carney JJ	1
Carnier P	1
Carpenter C	1
Carry P	1
Carsi B	1
Carson D	1
Casari FA	1
Casas-avila L	1
Caskey P	1
Castillo F	1
Castle WG	1
Cattini H	1
Cavaignac E	1
Celik H	1
Cella V	1
Cemalettin M	1
Cetinkaya M	1
Chambers HG	1
Chammas PE	1
Chandrasenan J	1
Chang JF	1
Chang JH	1
Chang S	1
Chao JC	1
Chase KL	1
Chaturvedi A	1
Chau E	1
Chen AW	1
Chen CH	1
Chen GM	1
Chen L	1
Chen LL	1
Chen T	1
Chen TY	1
Chen WC	1
Chen WD	1
Chen WH	1
Chen Y	1
Chen YP	1
Chen ZQ	1
Cheng TL	1
Cheon SY	1
Chiarini S	1
Chladek P	1
Cho S	1
Cho SH	1
Cho WT	1
Cho YJ	1
Choate S	1
Choi ES	1
Choi J	1
Choi PD	1
Choi YH	1
Chong DY	1
Chong M	1
Chotel F	1
Chotigavanichaya C	1
Christianakis S	1
Chuang TY	1
Chughtai M	1
Cielo B	1
Ciesielski CJ	1
Cil A	1
Cima CWM	1
Cirakli A	1
Ciupak GL	1
Clarke M	1
Clement JL	1
Clohisy J	1
Cobeljic G	1
Coley BD	1
Combescure C	1
Comte F	1
Conklin MJ	1
Conners CM	1
Connolly LP	1
Connolly P	1
Connolly S	1
Connolly SA	1
Conroy E	1
Conybeare ME	1
Cook PC	1
Cooperman DR	1
Cordeiro FG	1
Cormier-daire V	1
Cornaz F	1
Cornelia R	1
Corr MP	1
Cosgrove AP	1
Coskun S	1
Costa CR	1
Costa G	1
Cote K	1
Cottalorda J	1
Cowan JB	1
Cowell CT	1
Craig JG	1
Crofts H	1
Crostack HA	1
Crostak HA	1
Crovace A	1
Cui YX	1
Cunin V	1
Curci D	1
Cutright MT	1
D'entremont AG	1
Da Cunha ALM	1
Da Cunha AM	1
Dagher F	1
Dammerer D	1
Dang H	1
Dang SJ	1
Dang XQ	1
Dangerfield PH	1
Daniel AB	1
Danieli C	1
Dare CJ	1
Darwish N	1
Dastgheib SA	1
Dattani MT	1
David E	1
Dayton SR	1
De Billy B	1
De Gheldere A	1
De Miras DP	1
De Pasquale R	1
Deangelis NA	1
Defoort K	1
Dekeyser GJ	1
Dela Torre K	1
Delarocha A	1
Delclaux M	1
Delforge P	1
Dell'agli E	1
Della Grazia A	1
Delpont M	1
Demirts A	1
Dempsey ME	1
Dempsey-robertson ME	1
Denny HR	1
Der-boghossian AH	1
Devmurari K	1
Dhar S	1
Di Comite MS	1
Dib A	1
Diedrich O	1
Dietmar D	1
Dijkstra HP	1
Dippmann C	1
Distefano A	1
Diulus SC	1
Divi SN	1
Do DH	1
Do Kang K	1
Dobashi ET	1
Dobbs MB	1
Dobson C	1
Doderlein L	1
Dodgen WT	1
Dogbey G	1
Doi T	1
Dolinar D	1
Domenech C	1
Domzalski ME	1
Dorgeret S	1
Dory CE	1
Dos Santos GB	1
Doudouh A	1
Doyle JS	1
Drexler M	1
Drissi H	1
Druschel C	1
Du KL	1
Du W	1
Dujardin R	1
Duke G	1
Dunbar N	1
Duncan S	1
Dunne J	1
Dutoit M	1
Eamsobhana P	1
Eastwood DM	1
Easwar TR	1
Eberhardt O	1
Eberle MC	1
Eberson CP	1
Ebert C	1
Eceviz E	1
Ehara H	1
Eidelman M	1
El Bitar YF	1
El Ghazawy AK	1
El-bitar Y	1
El-harbiti A	1
El-hawary R	1
Elbanna A	1
Eldin MT	1
Elgeushy A	1
Elhayek T	1
Elmarghany M	1
Elnour AA	1
Elzahed E	1
Emara KM	1
Epeldegui-torre T	1
Er T	1
Eremeev A	1
Eren A	1
Erickson J	1
Erickson JA	1
Ermeley Z	1
Erturk C	1
Esenkaya I	1
Espinoza L	1
Etelzon I	1
Exner GU	1
Ezoe M	1
Fabry K	1
Fagan M	1
Fairbairn K	1
Falsaperla R	1
Fan LH	1
Fang B	1
Fang K	1
Fanord F	1
Fansa M	1
Fathy M	1
Fatoye F	1
Faure PA	1
Favia A	1
Fayad LM	1
Fayyad TA	1
Feder OI	1
Fedianin A	1
Feith R	1
Feng D	1
Ferey S	1
Ferlic P	1
Fernandez FF	1
Ferreira MT	1
Ferrer A	1
Ferrer M	1
Ferrer MG	1
Ferrer-torrelles M	1
Fichera M	1
Figler RA	1
Filho JL	1
Fine RN	1
Finlay AK	1
Fioruzzi A	1
Fisher PD	1
Flury A	1
Flynn JM	1
Foeldvari I	1
Foiadelli T	1
Forriol F	1
Forster KE	1
Forster MC	1
Forsythe C	1
Foti PV	1
Fox MG	1
Fraga M	1
Francioso E	1
Frankel JS	1
Freeman CR	1
Freeman RT	1
Freiman S	1
Frick SL	1
Friedlander JK	1
Fries IB	1
Frizziero P	1
Fu FY	1
Fujii M	1
Fujii T	1
Fujioka F	1
Fujioka M	1
Furnstahl P	1
Furst G	1
Gabriele AL	1
Gagala J	1
Gaillard MD	1
Galantay R	1
Galicia-alvarado MA	1
Gambling T	1
Gao H	1
Gao HH	1
Garber M	1
Garcia MI	1
Garcia RAN	1
Garcia-alfaro MD	1
Gardiner KL	1
Garnier E	1
Gaughan DM	1
Gaweda K	1
Gebhart JJ	1
Gedbaw E	1
Gee AO	1
Gemmill TJ	1
Georgiadis AG	1
Georgiev GP	1
Georgiev H	1
Geretschlager A	1
Gerhard K	1
Gerlach EB	1
Germain-lee E	1
Ghanem I	1
Ghanem IB	1
Gharanizadeh K	1
Giannotti CF	1
Gicquel P	1
Giesinger J	1
Gigante C	1
Gilat R	1
Gilbert S	1
Gill KG	1
Gillespie SE	1
Giordano BD	1
Girling S	1
Glard Y	1
Glorion C	1
Glueck CI	1
Glyn-jones S	1
Go CC	1
Go NR	1
Goksel F	1
Golge UH	1
Goncalves JP	1
Goni V	1
Gonzalez-lamuno D	1
Gonzalez-murillo A	1
Goodwin RC	1
Gordon AB	1
Gordon JE	1
Gorios A	1
Goronzy J	1
Gracia G	1
Grand K	1
Grande MM	1
Grangeia A	1
Gravius S	1
Greenhill DA	1
Greenspan BS	1
Grigoryan G	1
Grogan DP	1
Gross AE	1
Gross TP	1
Gruber G	1
Gu JK	1
Guarniero JRB	1
Guddettu V	1
Guenther RW	1
Guillaume JM	1
Guindani N	1
Gul A	1
Gulman B	1
Gunderson R	1
Gunther KP	1
Gunther RW	1
Guo KC	1
Gursu SS	1
Ha M	1
Ha YC	1
Haag AC	1
Haddad F	1
Haga N	1
Hagan L	1
Hagiwara S	1
Haidar RK	1
Hailer	1
Halanski M	1
Halefoglu AM	1
Halmai V	1
Hammad Y	1
Han JH	1
Hanke M	1
Hanquinet S	1
Hansson G	1
Hanypsiak B	1
Harada Y	1
Hartmann A	1
Hartwell MJ	1
Hasanin Y	1
Hashemi-nejad A	1
Haskel JD	1
Hasler J	1
Hassan M	1
Hasselschwert DL	1
Hattori T	1
Havlas V	1
Hayes LL	1
Haznedarog IC	1
Hebelka H	1
Heck K	1
Hedelin H	1
Heesakkers N	1
Hefny HM	1
Hegemann L	1
Heidenreich MJ	1
Heilberg IP	1
Heimkes B	1
Heinrich S	1
Helming MAB	1
Hemmer S	1
Hendriks J	1
Henner J	1
Herbert R	1
Herceg MB	1
Herrera-soto JA	1
Hetsroni I	1
Hicks JW	1
Hilfiker PR	1
Hinves BL	1
Hiroshima K	1
Hirsch MA	1
Hirschfelder H	1
Ho WP	1
Ho-fung VM	1
Hobatho MC	1
Hoch A	1
Hochman MG	1
Hodler J	1
Hofem R	1
Hofmann S	1
Hofstaetter JG	1
Hogg RJ	1
Holderbaum D	1
Holm I	1
Holmes L	1
Holmich P	1
Holscher HC	1
Holvoet L	1
Hong GJ	1
Hong T	1
Horackova L	1
Horii M	1
Horstmann JK	1
Hosny GA	1
Hovater W	1
Hsu JE	1
Hu C	1
Hu XL	1
Huang RL	1
Huang SC	1
Huang ZQ	1
Hubbard AM	1
Huebschmann NA	1
Hufeland M	1
Hughes MD	1
Huhnstock S	1
Hunter JB	1
Hurley ME	1
Hussein AEMA	1
Hyman J	1
Ieshima A	1
Ikegawa S	1
Ikram H	1
Ilharreborde B	1
Imaeda T	1
Inaba Y	1
Inan IH	1
Inan M	1
Innes JF	1
Inoue T	1
Irving M	1
Ishikawa C	1
Isikan UE	1
Ismael MF	1
Ismayilov V	1
Isola M	1
Ito H	1
Itzchaki M	1
Iwamoto M	1
Iwamoto Y	1
Jack O	1
Jacob G	1
Jacob Z	1
Jacobs R	1
Jacobson JA	1
Jacquemier M	1
Jang JH	1
Jang KS	1
Jang W	1
Janicki J	1
Janicki JA	1
Jansa J	1
Janssen D	1
Jaramillo D	1
Jardaly AH	1
Jarosova I	1
Jarvis JG	1
Jaukovic L	1
Jayakumar P	1
Jeandel C	1
Jeffords ME	1
Jenkins J	1
Ji YF	1
Jia ZX	1
Jiang B	1
Jiang XH	1
Johannesen J	1
Johnson AJ	1
Jones CE	1
Jones H	1
Jones K	1
Jones S	1
Jonsson K	1
Joo SY	1
Jopp E	1
Ju L	1
Judd J	1
Kadhim M	1
Kaewpornsawan K	1
Kaiser N	1
Kalchschmidt K	1
Kalish LA	1
Kamaci S	1
Kamath A	1
Kanatli U	1
Kaniklides C	1
Kannu P	1
Kantor SR	1
Kanz F	1
Karakurt L	1
Karimi M	1
Karmazyn B	1
Karol LA	1
Karout L	1
Kaste S	1
Katchburian MV	1
Kati YA	1
Katthagen BD	1
Kautzner J	1
Kawahara S	1
Kawamoto K	1
Kawasumi M	1
Kaymakoglu M	1
Kaymaz B	1
Kaymaz N	1
Kearns SR	1
Kehayov R	1
Kellam PJ	1
Keller MS	1
Kelly BT	1
Kelly D	1
Kenmoku T	1
Keret D	1
Kerimoglu S	1
Kessler C	1
Kessler JI	1
Key S	1
Khairouni A	1
Khajehnoori S	1
Khalife R	1
Khan AS	1
Khan I	1
Khan KM	1
Khanfour AA	1
Khanna V	1
Kharrat K	1
Kilic N	1
Kim A	1
Kim HJ	1
Kim KH	1
Kim PS	1
Kim UJ	1
Kirkham B	1
Kishta W	1
Kitano T	1
Kiymet S	1
Klaushofer K	1
Klein C	1
Klein G	1
Klerx-melis F	1
Klisch SM	1
Klotz MC	1
Kmiec K	1
Knight DM	1
Ko SM	1
Kobayashi R	1
Koczewski P	1
Koenderman JS	1
Koh IH	1
Kollitz KM	1
Komuucu E	1
Konermann W	1
Kong SY	1
Konstantoulakis C	1
Konya MN	1
Koo KH	1
Korcek L	1
Koren A	1
Korkes F	1
Kose O	1
Kosiol J	1
Kostenuik P	1
Kotoura Y	1
Koujok K	1
Kovacevic D	1
Kowal JH	1
Koziol JA	1
Kraemer O	1
Kraft C	1
Kraft CN	1
Krajewski K	1
Krajewski KL	1
Kramer J	1
Kramer M	1
Kranicz J	1
Kratky A	1
Kraus MJ	1
Kraus T	1
Krebs VE	1
Kremer L	1
Krieg AH	1
Krogsgaard M	1
Kropil P	1
Kulkarni AV	1
Kulkarni V	1
Kumabe S	1
Kumar D	1
Kumar S	1
Kumar V	1
Kuminack KF	1
Kurotaki T	1
Kuzyk PR	1
Kwok IHY	1
Labarre D	1
Lachman RS	1
Lacitignola L	1
Lacroix VJ	1
Lafond E	1
Lagerstrand K	1
Laine J	1
Laine T	1
Laino D	1
Laklouk MAR	1
Lalonde FD	1
Lamback EB	1
Lamer S	1
Lamplot JD	1
Landucci F	1
Langley-hobbs SJ	1
Langton DJ	1
Lanzman RS	1
Laredo J	1
Larnert P	1
Launay F	1
Lavalva SM	1
Le Duff MJ	1
Le Goff C	1
Le Pointe HD	1
Leao H	1
Lebel E	1
Lechevallier J	1
Leclet H	1
Lecuire F	1
Lederer C	1
Lee CC	1
Lee D	1
Lee HJ	1
Lee KM	1
Lee M	1
Lee MC	1
Lee SJ	1
Lee ST	1
Lee TJ	1
Lee YM	1
Lehner JT	1
Leibold C	1
Leo DG	1
Leong WY	1
Lerch TD	1
Lereim P	1
Leroux J	1
Letts M	1
Levin C	1
Levy-lahad E	1
Lewington MR	1
Lewis CL	1
Li CY	1
Li FL	1
Li GY	1
Li H	1
Li JC	1
Li JH	1
Li N	1
Li R	1
Li RT	1
Li TF	1
Li WC	1
Li WW	1
Li X	1
Li XJ	1
Li Y	1
Li YQ	1
Li YZ	1
Liang AJ	1
Liang ZP	1
Lim C	1
Lim JH	1
Lim WY	1
Lin SC	1
Lind M	1
Lind S	1
Linden B	1
Linhart WE	1
Lippacher S	1
Lipton GE	1
Littleton AG	1
Liu H	1
Liu JH	1
Liu K	1
Liu KY	1
Liu RK	1
Liu RY	1
Liu SL	1
Liu XH	1
Liu YC	1
Liu YZ	1
Liu Z	1
Liu ZJ	1
Liu ZT	1
Liu ZZ	1
Lobefalo L	1
Lobert PF	1
Lock AM	1
Lokiec F	1
Lomax LG	1
Lombardi AF	1
Long A	1
Lookzadeh MH	1
Loon TR	1
Lopez M	1
Lopreiato N	1
Lorenz N	1
Lou Y	1
Louahem'm'sabah D	1
Lovejoy JF	1
Lu M	1
Lucenti L	1
Luceri F	1
Luger M	1
Luhmann SJ	1
Lund B	1
Luo JZ	1
Luo ZY	1
Lyman S	1
Lynch B	1
Lyu XM	1
Ma RX	1
Maak TG	1
Mabry TM	1
Machida J	1
Machin DMG	1
Maciel R	1
Macintyre N	1
Macnicol M	1
Macnicol MF	1
Macqueen I	1
Madan S	1
Mader R	1
Madhuri V	1
Maegaki Y	1
Maffulli N	1
Mahadeva D	1
Mahdinezhad-yazdi M	1
Mahran MA	1
Makaron L	1
Mallet C	1
Malvitz T	1
Mankad K	1
Manzi TJ	1
Mara KC	1
Maranho DAC	1
Maras I	1
Marchand LS	1
Marcon M	1
Margetts BM	1
Mariano-goulart D	1
Marik I	1
Mariscalco M	1
Marseglia GL	1
Marshall RP	1
Martin H	1
Martin J	1
Martin MD	1
Martin TJ	1
Martinez-alvarez S	1
Martus JE	1
Marulanda GA	1
Mason JC	1
Masrouha KZ	1
Massa BSF	1
Mata SG	1
Matanovic D	1
Mathur K	1
Matsuda T	1
Matsuno T	1
Matthias B	1
Maus U	1
Mavcic B	1
Mawatari T	1
Mazzoleni MG	1
Mc Auliffe S	1
Mcconkey M	1
Mccourt JB	1
Mcgrory BJ	1
Mcmulkin ML	1
Mcninch A	1
Mcquade M	1
Mehlman C	1
Mehta JS	1
Mehta O	1
Meiss AL	1
Melao L	1
Melen-frajlich GJ	1
Menezes NM	1
Menge TJ	1
Mentzel HJ	1
Meredith J	1
Merlini L	1
Merzoug V	1
Mesa PAS	1
Metcalfe J	1
Meyer JS	1
Miao WS	1
Micali G	1
Mijares J	1
Mikulec K	1
Milbrandt TA	1
Milickovic S	1
Milla SS	1
Miller F	1
Miller T	1
Miller Y	1
Mills A	1
Minami A	1
Mingazov B	1
Minkara A	1
Mintz DN	1
Mirghaderi SP	1
Mitchell TW	1
Miura Y	1
Miyamoto Y	1
Mizuno K	1
Moawad M	1
Moberg A	1
Modi H	1
Mofenson LM	1
Moghimi M	1
Mohamed N	1
Moineddin R	1
Molloy RM	1
Monnet E	1
Monte F	1
Monte FA	1
Montgomery S	1
Moon YJ	1
Moores AP	1
Morano M	1
Morelli I	1
Moretti B	1
Morgan EF	1
Morgenstern R	1
Morin C	1
Morita M	1
Morizio A	1
Morlin GB	1
Morovati-sharifabad M	1
Morris W	1
Morrison S	1
Moscona L	1
Mosheiff D	1
Moskowitz RW	1
Mosler AB	1
Mosow N	1
Mota RMS	1
Motomura G	1
Moualeu A	1
Mow CS	1
Mu BH	1
Mulhall KJ	1
Mullan CJ	1
Mullhall KJ	1
Munns CF	1
Murgier J	1
Murphey MD	1
Murphy CM	1
Murphy KE	1
Murphy R	1
Murray C	1
Mustafa O	1
Muzaffar N	1
Myers GJ	1
Mygind-klavsen B	1
Myhre L	1
Na JB	1
Naffaa L	1
Nair S	1
Naito M	1
Nakagawa K	1
Nakakita Y	1
Nakamura N	1
Nakase M	1
Naser S	1
Nasrallah MP	1
Naziri Q	1
Neal D	1
Neamatzadeh H	1
Nectoux E	1
Nedder A	1
Nelitz M	1
Nelson R	1
Nelson S	1
Nelson SE	1
Nepple J	1
Neto RB	1
Neves MJ	1
Newman JS	1
Nguyen NAT	1
Nicholes MA	1
Nicolau RB	1
Niedhart C	1
Niese B	1
Niethard FU	1
Nilsson OS	1
Nimer A	1
Ninomiya T	1
Nishida A	1
Nixon T	1
Nogueira-barbosa MH	1
Noh CK	1
Noritake K	1
Norman D	1
Novellino P	1
Nowend KL	1
Ntoulia A	1
Nunally KD	1
Nunley RM	1
O'brien JC	1
O'brien K	1
O'connor P	1
O'connor PA	1
O'hara J	1
O'hara JN	1
O'leary JA	1
Oborocianu I	1
Odent S	1
Ogden JA	1
Oh MH	1
Ohashi H	1
Ohno K	1
Ohnsorge JAK	1
Ohtori S	1
Oikawa Y	1
Oinuma K	1
Oka Y	1
Okan E	1
Oke JL	1
Oketani H	1
Oleske JM	1
Onal V	1
Onyett J	1
Orita S	1
Oron A	1
Ortiz-declet V	1
Osland JD	1
Osman O	1
Otsuka T	1
Oufroukhi Y	1
Ovejero AH	1
Owen MR	1
Ozdemir H	1
Ozel BD	1
Ozel D	1
Ozer M	1
Ozkan F	1
Packer JD	1
Padilla D	1
Pagnano RG	1
Paidas C	1
Paley D	1
Palmucci S	1
Pan H	1
Papavasiliou A	1
Papp A	1
Parcells BW	1
Pardini MIDC	1
Parikh AK	1
Park BH	1
Park H	1
Park HW	1
Park SS	1
Pascual-garrido C	1
Pashos GE	1
Patil N	1
Patt TW	1
Pavone L	1
Pecasse GABM	1
Peck JB	1
Pecquery R	1
Peerlinck K	1
Pei FX	1
Pei XH	1
Pelet S	1
Peng Y	1
Pennecot GF	1
Penno E	1
Peppler C	1
Pereira RR	1
Perets I	1
Peretti GM	1
Perez-nunez MI	1
Pestka JM	1
Petermann A	1
Peters KM	1
Petty CA	1
Philippon M	1
Phillips W	1
Phinyo P	1
Phipps M	1
Piazzolla A	1
Pienkowski D	1
Pinheiro MD	1
Pinna S	1
Pirrone C	1
Placzek R	1
Podeszwa D	1
Polat YD	1
Polguj M	1
Ponce P	1
Pool RR	1
Poul J	1
Pouletaut P	1
Poulson A	1
Pratico AD	1
Price K	1
Pring ME	1
Prior J	1
Pujari R	1
Puleo DA	1
Puschel K	1
Qing LM	1
Quigley EJ	1
Raab D	1
Raab P	1
Rab GT	1
Rabenhorst SHB	1
Ragb A	1
Rahl MD	1
Rahm S	1
Rahner N	1
Rai S	1
Rainer B	1
Rajan R	1
Rajan RA	1
Ramanathan AK	1
Ramazanov R	1
Ramirez-orellana M	1
Rampal V	1
Randall TS	1
Randelli F	1
Raney EM	1
Rao S	1
Raske ME	1
Ravanbod H	1
Rebay-salisbury K	1
Rebolledo BJ	1
Reddy RR	1
Redlund-johnell I	1
Rega AN	1
Reichel H	1
Reikeras O	1
Reinker KA	1
Reinsch B	1
Reith A	1
Renbaum P	1
Rendl B	1
Resig J	1
Ricciardi BF	1
Rice J	1
Rich MM	1
Richards A	1
Ridderbusch K	1
Ries AJ	1
Rigsby CK	1
Riley GM	1
Risto O	1
Roberts CC	1
Roberts NW	1
Rocak K	1
Rodrigues JC	1
Rodrigues M	1
Rodrigues RG	1
Rogers KJ	1
Rogers MJ	1
Roposch A	1
Rosales-cruz E	1
Roschger P	1
Rosello O	1
Rosenberg ZS	1
Rosendaal FR	1
Rosenfeld S	1
Rosery K	1
Ross J	1
Rossi F	1
Rossi M	1
Roth A	1
Roth I	1
Rubin DA	1
Rudd J	1
Rupprecht M	1
Ruther W	1
Ryan K	1
Sabo E	1
Sachse A	1
Sadat-ali M	1
Safdar N	1
Safir OA	1
Safran MR	1
Safwat A	1
Saglam Y	1
Saito T	1
Salama K	1
Salata MJ	1
Salmeron F	1
Salturk T	1
Samarah OQ	1
Sambandam SN	1
Sampaio ML	1
Samuel LT	1
Sanchez JM	1
Sanchez-lara PA	1
Sanders C	1
Sanders LLO	1
Sandquist S	1
Sanmartin-viron D	1
Sans N	1
Santili C	1
Santore RF	1
Saoud AMF	1
Sapienza M	1
Sapienza MT	1
Saran N	1
Sarikaya IA	1
Sarraf KM	1
Sasaki M	1
Sato T	1
Savarirayan R	1
Schabel K	1
Schaeffer EK	1
Schepis C	1
Scheurecker A	1
Schilling AF	1
Schindeler A	1
Schmid OA	1
Schmidt A	1
Schmidt T	1
Schreurs W	1
Schroeder PB	1
Schulz M	1
Schulze A	1
Schweitzer ME	1
Scott HW	1
Seage GR	1
Sebag GH	1
Sedigh J	1
Seeley MA	1
Sees JP	1
Segal AB	1
Segawa Y	1
Seiter MN	1
Selberg CM	1
Sen C	1
Seo HY	1
Seol JY	1
Seon JK	1
Serner A	1
Set T	1
Seufert CR	1
Seuser A	1
Severson EP	1
Sewell MD	1
Seyler TM	1
Sezgin H	1
Shabshin N	1
Shah HH	1
Shah HT	1
Shah IP	1
Shah SA	1
Shaikh S	1
Shalev S	1
Shankar R	1
Shapiro F	1
Sharma S	1
Shata O	1
Shaw KA	1
Shaykhutdinov I	1
Shehab A	1
Sheikh A	1
Shenker N	1
Sherlock DA	1
Shewale S	1
Shibata KR	1
Shin CH	1
Shiozawa R	1
Shirai Y	1
Shiratsuchi H	1
Shulman A	1
Shupak A	1
Siebenrock K	1
Silva E	1
Simon AL	1
Singh A	1
Singhal M	1
Sinicato CM	1
Sink E	1
Sink EL	1
Siqeca A	1
Sirinelli D	1
Sirtori MD	1
Skelton DN	1
Skrok J	1
Slavkovic N	1
Slavkovic S	1
Slobogean BL	1
Small KM	1
Smedley JV	1
Smith E	1
Snead M	1
Soares RW	1
Sobhan MR	1
Sodhi N	1
Sofia V	1
Sofu H	1
Solarino G	1
Solla F	1
Song MG	1
Song QC	1
Song SH	1
Song YY	1
Song ZQ	1
Sosa N	1
Soydan Z	1
Soylemez MS	1
Sparta MV	1
Spiro AS	1
Spottswood S	1
Spottswood SE	1
Staffieri F	1
Stall A	1
Stancak A	1
Standefer KD	1
Starcevic B	1
Starr-moss AN	1
Stearns KL	1
Steinwender G	1
Stepanovich M	1
Stephenson N	1
Stetler J	1
Stevens DB	1
Stevens WR	1
Strahl A	1
Strano S	1
Strobl WM	1
Stucker MHF	1
Stucker R	1
Sucato D	1
Sujlana P	1
Sullivan N	1
Sultan AA	1
Sun XT	1
Sun ZW	1
Sun ZY	1
Sung KH	1
Sung MJ	1
Surace MF	1
Suri M	1
Sutter B	1
Suzuki K	1
Svehlik M	1
Svenningsen S	1
Swarup I	1
Swiatek PR	1
Swider P	1
Swisher S	1
Szponder T	1
Szymanski DA	1
Tai TH	1
Takahashi KA	1
Takahashi T	1
Takamine Y	1
Takeshita K	1
Talavera C	1
Talmac MA	1
Tan A	1
Tan YY	1
Tang JY	1
Tang WJ	1
Tang X	1
Tang Y	1
Tang YP	1
Tangadulrat P	1
Tao SS	1
Tarczynska M	1
Taskin A	1
Taskiran M	1
Taylor JF	1
Telang SS	1
Teles N	1
Tellioglu AM	1
Teo T	1
Terjesen T	1
Testa G	1
Thacker M	1
Thacker MM	1
Thakeb MF	1
Thakkinstian A	1
Than P	1
Thava VR	1
Thaveeratitharm C	1
Theologis TN	1
Thielemann F	1
Tho MCHB	1
Thomas S	1
Thompson GH	1
Thompson LJ	1
Thomson D	1
Thornton T	1
Tingart M	1
Tjong VK	1
Tokunaga D	1
Tompkins B	1
Tontanahal S	1
Topouchian V	1
Torrington AM	1
Tracy T	1
Trampota F	1
Trc T	1
Trostel CT	1
Troupis JM	1
Trousdale RT	1
[truncated: 206 more rows]
